# Supplementary material for: DNA Methylation Profiling in Pheochromocytoma and Paraganglioma Reveals Diagnostic and Prognostic Markers
Source: Oxford University Press journal article supplement (doi:10.1158/1078-0432.ccr-14-2804), 2015-04-01
Supplement: 10780432ccr142804-sup-140217_2_supp_2889668_nksr8r.xlsx [file 10780432ccr142804-sup-140217_2_supp_2889668_nksr8r.xlsx]

## Sheet: Suppl Table 1.FInal
Supplementary Table 1. Detailed clinical information of PPGL samples
Sample IDa	GEO Idb	Series	Platformc	Clinicald	Age	Sex	Locatione	Genotype	Mutation nucleotide	Mutation protein	Event	Metastasis Delay (Months)	Death	Follow Up (Months)	Hierarchical Cluster Member	Consensus Cluster Member
B_EPAS1.DS01	GSM1523217	DS	27K	B	42	F	PGL	EPAS1	c.1600_1608del	p.Pro534_Asp536del	No	-	No	60	C1B	C1B
B_EPAS1.DS02	GSM1523243	DS	27K	B	46	F	PCC	EPAS1	c.1599_1604del	p.Ile533_Pro534del	No	-	No	NA	C1B	C1B
B_EPAS1.DS03	GSM1523278	DS	27K	B	78	F	PGL	EPAS1	c.1615G>T	p.Asp539Tyr	No	-	No	103	C2	C2
B_EPAS1.DS04	GSM1523279	DS	27K	B	22	F	PCC	EPAS1	c.1588G>A	p.A530Thr	No	-	No	196	C1B	C1B
B_HRAS.DS01	GSM1523281	DS	27K	B	45	M	PCC	HRAS	c.182A>G	p.Gln61Arg	No	-	No	7	C2	C2
B_HRAS.DS02	GSM1523301	DS	27K	B	72	F	PCC	HRAS	c.182A>G	p.Gln61Arg	No	-	No	40	C2	C2
B_MAX.DS01	GSM1523208	DS	27K	B	39	M	PCC	MAX	c.223C>T	p.Arg75X	No	-	No	55	C2	C2
B_MAX.DS02	GSM1523257	DS	27K	B	29	M	PCC	MAX	c.223C>T	p.Arg75X	No	-	No	50	C2	C2
M_MAX.DS03	GSM1523236	DS	27K	M	32	M	PCC	MAX	c.295+1G>A	p.?	Yes	195	No	309	C2	C2
M_MAX.DS04	GSM1523276	DS	27K	M	46	F	PCC	MAX	c.1A>G	p.Met1?	Yes	60	Yes	192	C2	C2
B_NF1.DS01	GSM1523210	DS	27K	B	30	M	PCC	NF1	CDf	CDf	No	-	No	0	C1B	C1B
B_NF1.DS02	GSM1523232	DS	27K	B	38	F	PCC	NF1	c.1062+2T>C	p.?	No	-	No	NA	C2	C2
B_NF1.DS03	GSM1523234	DS	27K	B	53	F	PCC	NF1	CDf	CDf	No	-	No	0	C2	C2
B_NF1.DS04	GSM1523306	DS	27K	B	59	F	PCC	NF1	CDf	CDf	No	-	No	0	C2	C2
B_NF1.DS05	GSM1523258	DS	27K	B	51	F	PCC	NF1	c.6855C>A	p.Tyr2285X	No	-	No	120	C2	C2
B_NF1.DS06	GSM1523267	DS	27K	B	47	M	PCC	NF1	CDf	CDf	No	-	No	0	C1B	C1B
B_NF1.DS07	GSM1523307	DS	27K	B	48	F	PCC	NF1	CDf	CDf	No	-	No	48	C1B	C1B
B_NF1.DS08	GSM1523308	DS	27K	B	59	M	PCC	NF1	CDf	CDf	No	-	No	39	C2	C2
B_RET.DS01	GSM1523207	DS	27K	B	34	M	PCC	RET	c.1853G>T	p.Cys618Phe	No	-	No	113	C1B	C1B
B_RET.DS02	GSM1523214	DS	27K	B	48	F	PCC	RET	c.1901G>A	p.Cys634Tyr	No	-	No	221	C1B	C1B
B_RET.DS03	GSM1523216	DS	27K	B	51	F	PCC	RET	c.1901G>A	p.Cys634Tyr	No	-	No	NA	C1B	C2
B_RET.DS04	GSM1523224	DS	27K	B	43	F	PCC	RET	c.1833C>T	p.Cys611Phe	No	-	No	96	C2	C2
B_RET.DS05	GSM1523225	DS	27K	B	28	F	PCC	RET	c.1900T>C	p.Cys634Arg	No	-	No	29	C2	C2
B_RET.DS06	GSM1523228	DS	27K	B	41	F	PCC	RET	c.1900T>A	p.Cys634Ser	No	-	No	13	C2	C2
B_RET.DS07	GSM1523238	DS	27K	B	45	M	PCC	RET	c.1901G>A	p.Cys634Tyr	No	-	No	NA	C2	C2
B_RET.DS08	GSM1523242	DS	27K	B	45	M	PCC	RET	c.1900T>C	p.Cys634Arg	No	-	No	NA	C2	C2
B_RET.DS09	GSM1523254	DS	27K	B	48	F	PCC	RET	c.2753T>C	p.Met918Thr	No	-	No	80	C2	C2
B_RET.DS10	GSM1523272	DS	27K	B	34	M	PCC	RET	c.2753C>T	p.Met918Thr	No	-	No	204	C2	C2
B_RET.DS11	GSM1523273	DS	27K	B	24	F	PCC	RET	c.1900T>C	p.Cys634Arg	No	-	No	264	C2	C2
B_RET.DS12	GSM1523274	DS	27K	B	21	F	PCC	RET	c.1826G>C	p.Cys609Ser	No	-	No	252	C2	C2
B_RET.DS13	GSM1523275	DS	27K	B	18	F	PCC	RET	c.2753C>T	p.Met918Thr	No	-	No	84	C2	C2
B_RET.DS14	GSM1523282	DS	27K	B	29	F	PCC	RET	c.1901G>C	p.Cys634Ser	No	-	No	132	C2	C2
B_RET.DS15	GSM1523286	DS	27K	B	22	F	PCC	RET	c.1891G>T	p.Asp631Tyr	No	-	No	44	C2	C2
B_RET.DS16	GSM1523309	DS	27K	B	64	M	PCC	RET	c.1901G>A	p.Cys634Tyr	No	-	No	24	C1B	C2
B_RET.DS17	GSM1523310	DS	27K	B	77	F	PCC	RET	c.1900T>C	p.Cys634Arg	No	-	No	3	C2	C2
B_RET.DS18	GSM1523291	DS	27K	B	31	F	PCC	RET	c.1901G>A	p.Cys634Tyr	No	-	No	84	C2	C2
B_RET.DS19	GSM1523298	DS	27K	B	35	F	PCC	RET	CDf	CDf	No	-	No	85	C1B	C1B
B_RET.DS20	GSM1523299	DS	27K	B	24	M	PCC	RET	c.1900T>C	p.Cys634Arg	No	-	No	62	C1B	C2
B_RET.DS21	GSM1523290	DS	27K	B	77	F	PCC	RET	c.1900T>C	p.Cys634Arg	No	-	No	0	C2	C2
B_RET.DS22	GSM1523311	DS	27K	B	52	M	PCC	RET	c.1852T>G	p.Cys618Gly	No	-	No	116	C2	C2
B_RET.DS23	GSM1523312	DS	27K	B	29	F	PCC	RET	c.2753T>C	p.Met918Thr	No	-	No	48	C2	C2
B_RET.DS24	GSM1523313	DS	27K	B	43	F	PCC	RET	c.1901G>A	p.Cys634Tyr	No	-	No	180	C2	C2
B_RET.DS25	GSM1523314	DS	27K	B	43	M	PCC	RET	c.1901G>A	p.Cys634Tyr	No	-	No	180	C2	C2
B_RET.DS26	GSM1523315	DS	27K	B	51	M	PCC	RET	c.1901G>A	p.Cys634Tyr	No	-	No	42	C2	C2
B_SDHB.DS01	GSM1523220	DS	27K	B	14	M	PGL	SDHB	exon 1 deletion	p.?	No	-	No	16	C1B	C1A
B_SDHB.DS02	GSM1523259	DS	27K	B	56	M	PGL	SDHB	c.464 C>G	p.Pro155Arg	No	-	No	43	C1A	C1A
B_SDHB.DS03	GSM1523264	DS	27K	B	22	M	PGL	SDHB	c.689G>A	p.Arg230His	No	-	No	152	C1A	C1A
B_SDHB.DS04	GSM1523277	DS	27K	B	10	M	PCC	SDHB	c.158_c.200+112del	p.?	No	-	No	108	C1A	C1A
M_SDHB.DS05	GSM1523227	DS	27K	M	53	F	PGL	SDHB	c.727T>A	p.Cys243Ser	Yes	36	Yes	39	C1A	C1A
M_SDHB.DS06	GSM1523230	DS	27K	M	20	M	PGL	SDHB	c.423+1G>A	p.?	Yes	0	No	24	C1A	C1A
M_SDHB.DS07	GSM1523256	DS	27K	M	32	F	PGL	SDHB	c.166_170delCCTCA	p.Pro56Tyrfs*5	Yes	0	Yes	69	C1A	C1A
M_SDHB.DS08	GSM1523269	DS	27K	M	24	F	PCC	SDHB	exon 1 deletion	p.?	Yes	3	Yes	70	C1A	C1A
B_SDHD.DS01	GSM1523303	DS	27K	B	57	M	PCC	SDHD	c.64C>T	p.Arg22X	No	-	No	67	C1A	C1A
B_SDHD.DS02	GSM1523302	DS	27K	B	27	M	PGL	SDHD	SOON	SOON	No	-	No	54	C1A	C1A
B_TMEM127.DS1	GSM1523271	DS	27K	B	54	F	PCC	TMEM127	c.245-1G>T	p.?	No	-	No	96	C2	C2
B_VHL.DS01	GSM1523213	DS	27K	B	17	M	PCC	VHL	c.482G>A	p.Arg161Gln	No	-	No	3	C1B	C1B
B_VHL.DS02	GSM1523215	DS	27K	B	9	F	PCC	VHL	c.482G>A	p.Arg161Gln	No	-	No	85	C1B	C1A
B_VHL.DS03	GSM1523221	DS	27K	B	47	F	PCC	VHL	CDf	CDf	No	-	No	48	C1B	C1B
B_VHL.DS04	GSM1523223	DS	27K	B	47	M	PCC	VHL	c.500G>A	p.Arg167Gln	No	-	No	3	C1B	C1B
B_VHL.DS05	GSM1523226	DS	27K	B	37	M	PCC	VHL	c.482G>A	p.Arg161Gln	No	-	No	60	C1B	C1B
B_VHL.DS06	GSM1523231	DS	27K	B	36	M	PCC	VHL	c.277G>A	p.Gly93Ser	No	-	No	84	C1B	C1B
B_VHL.DS07	GSM1523237	DS	27K	B	13	F	PCC	VHL	c.482G>A	p.Arg161Gln	No	-	No	NA	C1B	C1B
B_VHL.DS08	GSM1523244	DS	27K	B	12	M	PCC	VHL	c.523T>A	p.Tyr175Asn	No	-	No	40	C1B	C1B
B_VHL.DS09	GSM1523260	DS	27K	B	35	M	PCC	VHL	c.260T>C	p.Val87Ala	No	-	No	8	C1B	C1B
B_VHL.DS10	GSM1523316	DS	27K	B	42	M	PGL	VHL	c.467A>G	p.Tyr156Cys	No	-	No	42	C1B	C1B
B_VHL.DS11	GSM1523270	DS	27K	B	13	F	PCC	VHL	CDf	CDf	No	-	No	63	C1B	C1B
B_VHL.DS12	GSM1523284	DS	27K	B	14	M	PCC	VHL	c.460C>A	p.Pro154Thr	No	-	No	4	C1B	C1B
B_VHL.DS13	GSM1523285	DS	27K	B	30	F	PCC	VHL	c.500G>A	p.Arg167Gln	No	-	No	108	C1B	C1B
B_VHL.DS14	GSM1523287	DS	27K	B	47	M	PCC	VHL	c.414A>G	p.Pro138Pro	No	-	No	36	C1B	C1B
B_VHL.DS15	GSM1523288	DS	27K	B	30	M	PCC	VHL	c.256C>T	p.Pro86Ser	No	-	No	72	C1B	C1B
B_VHL.DS16	GSM1523289	DS	27K	B	42	M	PCC	VHL	c.467A>G	p.Tyr156Cys	No	-	No	42	C1B	C1B
B_VHL.DS17	GSM1523295	DS	27K	B	26	M	PCC	VHL	c.481C>G	p.Arg161Gly	No	-	No	6	C1B	C1B
B_VHL.DS18	GSM1523263	DS	27K	B	42	M	PGL	VHL	c.467A>G	p.Tyr156Cys	No	-	No	42	C1B	C1B
B_VHL.DS19	GSM1523317	DS	27K	B	38	M	PCC	VHL	c.500G>A	p.Arg167Gln	No	-	No	83	C1B	C1B
B_VHL.DS20	GSM1523327	DS	27K	B	46	F	PCC	VHL	c.241C>T	p.Pro81Ser	No	-	No	NA	C2	C2
B_VHL.DS21	GSM1523305	DS	27K	B	51	F	PCC	VHL	c.389T>G	p.Val130Gly	No	-	No	5	C1B	C1B
B_VHL.DS22	GSM1523318	DS	27K	B	13	F	PCC	VHL	c.533T>C	p.Leu178Pro	No	-	No	63	C1B	C1B
M_VHL.DS23	GSM1523229	DS	27K	M	8	F	PCC	VHL	c.277G>A	p.Gly93Ser	Yes	24	No	49	C1B	C1B
B_WT.DS01	GSM1523206	DS	27K	B	76	M	PGL	WT	-	-	No	-	No	16	C2	C2
B_WT.DS02	GSM1523209	DS	27K	B	52	F	PCC	WT	-	-	No	-	No	26	C2	C2
B_WT.DS03	GSM1523211	DS	27K	B	36	M	PCC	WT	-	-	No	-	No	62	C2	C2
B_WT.DS04	GSM1523245	DS	27K	B	49	M	PCC	WT	-	-	No	-	No	108	C2	C2
B_WT.DS05	GSM1523328	DS	27K	B	76	M	PGL	WT	-	-	No	-	No	36	C2	C2
B_WT.DS06	GSM1523248	DS	27K	B	65	F	PCC	WT	-	-	No	-	No	43	C1B	C1B
B_WT.DS07	GSM1523249	DS	27K	B	70	M	PCC	WT	-	-	No	-	No	57	C2	C2
B_WT.DS08	GSM1523250	DS	27K	B	70	F	PCC	WT	-	-	No	-	No	64	C2	C2
B_WT.DS09	GSM1523251	DS	27K	B	44	F	PCC	WT	-	-	No	-	No	0	C2	C2
B_WT.DS10	GSM1523253	DS	27K	B	69	F	PCC	WT	-	-	No	-	No	66	C2	C2
B_WT.DS11	GSM1523320	DS	27K	B	52	M	PCC	WT	-	-	No	-	No	44	C2	C2
B_WT.DS12	GSM1523261	DS	27K	B	66	M	PCC	WT	-	-	No	-	No	53	C2	C2
B_WT.DS13	GSM1523262	DS	27K	B	64	M	PCC	WT	-	-	No	-	No	40	C2	C2
B_WT.DS14	GSM1523265	DS	27K	B	62	M	PCC	WT	-	-	No	-	No	NA	C2	C2
B_WT.DS15	GSM1523280	DS	27K	B	33	F	PGL	WT	-	-	No	-	No	30	C1A	C1A
B_WT.DS16	GSM1523283	DS	27K	B	61	M	PGL	WT	-	-	No	-	No	4	C1B	C1B
B_WT.DS17	GSM1523319	DS	27K	B	34	F	PGL	WT	-	-	No	-	No	55	C2	C2
B_WT.DS18	GSM1523321	DS	27K	B	30	F	PCC	WT	-	-	No	-	No	58	C2	C2
B_WT.DS19	GSM1523293	DS	27K	B	37	F	PCC	WT	-	-	No	-	No	58	C2	C2
B_WT.DS20	GSM1523294	DS	27K	B	60	F	PCC	WT	-	-	No	-	No	58	C2	C2
B_WT.DS21	GSM1523322	DS	27K	B	37	F	PCC	WT	-	-	No	-	No	68	C1A	C1A
B_WT.DS22	GSM1523246	DS	27K	B	27	F	PCC	WT	-	-	No	-	No	36	C1B	C1B
B_WT.DS23	GSM1523297	DS	27K	B	46	M	PCC	WT	-	-	No	-	No	48	C1A	C1A
B_WT.DS24	GSM1523323	DS	27K	B	25	F	PGL	WT	-	-	No	-	No	18	C1A	C1A
B_WT.DS25	GSM1523304	DS	27K	B	25	F	PGL	WT	-	-	No	-	No	83	C2	C2
B_WT.DS26	GSM1523324	DS	27K	B	50	F	PCC	WT	-	-	No	-	No	83	C2	C2
B_WT.DS27	GSM1523325	DS	27K	B	57	M	PCC	WT	-	-	No	-	No	1	C2	C2
B_WT.DS28	GSM1523326	DS	27K	B	39	M	PCC	WT	-	-	No	-	No	3	C2	C2
M_WT.DS29	GSM1523233	DS	27K	M	48	F	PCC	WT	-	-	Yes	0	No	NA	C1B	C1B
M_WT.DS30	GSM1523212	DS	27K	M	61	M	PCC	WT	-	-	Yes	0	No	9	C1B	C1B
M_WT.DS31	GSM1523219	DS	27K	M	64	M	PCC	WT	-	-	Yes	12	No	36	C2	C2
M_WT.DS32	GSM1523222	DS	27K	M	64	M	PCC	WT	-	-	Yes	68	Yes	72	C1A	C1A
M_WT.DS33	GSM1523235	DS	27K	M	32	F	PCC	WT	-	-	Yes	40	yes	108	C1B	C1B
M_WT.DS34	GSM1523239	DS	27K	M	56	M	PCC	WT	-	-	Yes	0	No	32	C2	C2
M_WT.DS35	GSM1523240	DS	27K	M	43	F	PCC	WT	-	-	Yes	0	No	82	C1B	C1B
M_WT.DS36	GSM1523241	DS	27K	M	65	M	PCC	WT	-	-	Yes	13	yes	80	C2	C2
M_WT.DS37	GSM1523247	DS	27K	M	66	M	PCC	WT	-	-	Yes	0	No	72	C1B	C1B
M_WT.DS38	GSM1523252	DS	27K	M	42	M	PCC	WT	-	-	Yes	13	No	72	C1B	C1A
M_WT.DS39	GSM1523255	DS	27K	M	40	M	PCC	WT	-	-	Yes	10	No	121	C2	C2
M_WT.DS40	GSM1523266	DS	27K	M	67	M	PCC	WT	-	-	Yes	0	No	121	C1B	C1A
M_WT.DS41	GSM1523268	DS	27K	M	47	F	PCC	WT	-	-	Yes	23	No	33	C2	C2
M_WT.DS42	GSM1523292	DS	27K	M	37	F	PCC	WT	-	-	Yes	0	No	100	C1B	C1B
M_WT.DS43	GSM1523296	DS	27K	M	63	M	PGL	WT	-	-	Yes	27	yes	33	C1A	C2
M_WT.DS44	GSM1523300	DS	27K	M	63	M	PCC	WT	-	-	Yes	27	yes	33	C2	C2
M_WT.DS45	GSM1523218	DS	27K	M	74	M	PCC	WT	-	-	Yes	0	No	31	C2	C1B
M_WT.VSI30	GSM957913	VS1	27K	M	63	F	meta	FH	c.349G>C	p.Ala117Pro	Yes	-	No	3	-	-
B_MAX.VSI01	GSM957872	VS1	27K	B	56	F	PCC	MAX	c.25delG	p.Val9TrpfsX56	No	-	No	26	-	-
B_MAX.VSI02	GSM957918	VS1	27K	B	27	M	PCC	MAX	entire MAX deletion	p.?	No	-	No	9	-	-
B_MAX.VSI03	GSM957923	VS1	27K	B	24	M	PCC	MAX	c.140_157del	p.Arg47Ser52del	No	-	No	5	-	-
B_MAX.VSI04	GSM957971	VS1	27K	B	56	F	PCC	MAX	c.103C>T	p.Arg35Cys	No	-	No	125	-	-
B_NF1.VSI01	GSM957838	VS1	27K	B	41	F	PCC	NF1	c.3025del	p.Ile1009phefs*3	No	-	No	90	-	-
B_NF1.VSI02	GSM957839	VS1	27K	B	43	M	PCC	NF1	c.7393del	p.Arg2465Glyfs*3	No	-	No	1	-	-
B_NF1.VSI03	GSM957847	VS1	27K	B	56	F	PCC	NF1	c.22409+1G>A	p.Ala776_Gln803del	No	-	No	68	-	-
B_NF1.VSI04	GSM957857	VS1	27K	B	65	F	PCC	NF1	c.3158C>A	p.Ser1053*	No	-	No	26	-	-
B_NF1.VSI05	GSM957861	VS1	27K	B	37	F	PCC	NF1	CDf	CDf	No	-	No	67	-	-
B_NF1.VSI06	GSM957863	VS1	27K	B	51	F	PCC	NF1	c.3398_3399del	p.Glu1133Aspfs*61	No	-	No	7	-	-
M_NF1.VSI07	GSM957866	VS1	27K	M	40	M	PCC	NF1	c.489del	p.Glu163Aspfs*61	Yes	-	No	21	-	-
B_NF1.VSI08	GSM957868	VS1	27K	B	57	M	PCC	NF1	Whole gene deletion	No protein	No	-	No	22	-	-
B_NF1.VSI09	GSM957869	VS1	27K	B	52	F	PCC	NF1	c.2546del	p.Gly849Glufs*29	No	-	No	79	-	-
B_NF1.VSI10	GSM957874	VS1	27K	B	53	M	PCC	NF1	c.7519C>T	p.Gln2528*	No	-	No	8	-	-
B_NF1.VSI11	GSM957877	VS1	27K	B	73	M	PCC	NF1	c.7583C>G	p.Ser2549*	No	-	No	62	-	-
B_NF1.VSI12	GSM957878	VS1	27K	B	55	F	PCC	NF1	c.5675_5678del	p.Lys1913Asnfs*11	No	-	No	9	-	-
B_NF1.VSI13	GSM957879	VS1	27K	B	42	F	PCC	NF1	CDf	CDf	No	-	No	98	-	-
B_NF1.VSI14	GSM957880	VS1	27K	B	63	M	PCC	NF1	CDf	CDf	No	-	No	74	-	-
B_NF1.VSI15	GSM957883	VS1	27K	B	33	F	PCC	NF1	CDf	CDf	No	-	No	7	-	-
B_NF1.VSI16	GSM957889	VS1	27K	B	38	F	PCC	NF1	CDf	CDf	No	-	No	50	-	-
B_NF1.VSI17	GSM957898	VS1	27K	B	57	M	PCC	NF1	c.8046_8047delinsTT	p.Gln2703*	No	-	No	22	-	-
B_NF1.VSI18	GSM957906	VS1	27K	B	52	F	PCC	NF1	c.7096_7101del	p.Asn2366_2367del	No	-	No	68	-	-
B_NF1.VSI19	GSM957909	VS1	27K	B	32	F	PCC	NF1	CDf	CDf	No	-	No	27	-	-
B_NF1.VSI20	GSM957912	VS1	27K	B	51	F	PCC	NF1	c.392_408del	p.Ala131Glyfs*18	No	-	No	3	-	-
M_NF1.VSI21	GSM957932	VS1	27K	M	41	M	Meta	NF1	c.3721C>T	p.Arg1241*	Yes	0	No	60	-	-
B_NF1.VSI22	GSM957933	VS1	27K	B	65	M	PCC	NF1	CDf	CDf	No	-	No	6	-	-
B_NF1.VSI23	GSM957938	VS1	27K	B	37	F	PCC	NF1	c.397del	p.Ala1321Leufs*33	No	-	No	28	-	-
B_NF1.VSI24	GSM957941	VS1	27K	B	39	M	PCC	NF1	c.2533del	p.Cys845Valfs*33	No	-	No	81	-	-
B_NF1.VSI25	GSM957942	VS1	27K	B	53	F	PCC	NF1	c.1885G>A	p.Gln616Glyfs*4	No	-	No	44	-	-
B_NF1.VSI26	GSM957946	VS1	27K	B	61	F	PCC	NF1	c.3196+2T>G/c.5184insA	p.Asn1039_Arg1065del/p.Asp1728Argfs*7	No	-	No	31	-	-
B_NF1.VSI27	GSM957948	VS1	27K	B	62	F	PCC	NF1	c.205-1G>C	p.Arg69Asnfs*7	No	-	No	115	-	-
B_NF1.VSI28	GSM957953	VS1	27K	B	42	F	PCC	NF1	c.2939_2958del	p.Ser980*	No	-	No	15	-	-
B_NF1.VSI29	GSM957959	VS1	27K	B	46	M	PCC	NF1	c.6800_6801del	p.Gln2287Argfs*18	No	-	No	35	-	-
B_NF1.VSI30	GSM957975	VS1	27K	B	53	M	PCC	NF1	c.971_976del	p.Cys324*	No	-	No	13	-	-
B_RET.VSI01	GSM957844	VS1	27K	B	29	F	PCC	RET	c.1901G>A	p.Cys634Tyr	No	-	No	38	-	-
B_RET.VSI02	GSM957862	VS1	27K	B	51	F	PCC	RET	c.2753T>C	p.Met918Thr	No	-	No	2	-	-
B_RET.VSI03	GSM957873	VS1	27K	B	59	M	PCC	RET	c.2753T>C	p.Met918Thr	No	-	No	21	-	-
B_RET.VSI04	GSM957884	VS1	27K	B	44	F	PCC	RET	[c.2647G>T; c.2648C>T]	p.Ala883Phe	No	-	No	42	-	-
B_RET.VSI05	GSM957895	VS1	27K	B	18	F	PCC	RET	c.1900T>C	p.Cys634Arg	No	-	No	150	-	-
B_RET.VSI06	GSM957896	VS1	27K	B	62	M	PCC	RET	c.2753T>C	p.Met918Thr	No	-	No	59	-	-
B_RET.VSI07	GSM957905	VS1	27K	B	25	M	PCC	RET	c.1900T>C	p.Cys634Arg	No	-	No	84	-	-
B_RET.VSI08	GSM957924	VS1	27K	B	76	F	PCC	RET	c.1597G>T	p.Gly533Cys	No	-	No	32	-	-
B_RET.VSI09	GSM957926	VS1	27K	B	27	F	PCC	RET	c.1900T>C	p.Cys634Arg	No	-	No	33	-	-
B_RET.VSI10	GSM957937	VS1	27K	B	37	F	PCC	RET	[c.1901G>T;c.1902C>G]	p.Cys634Leu	No	-	No	54	-	-
B_RET.VSI11	GSM957950	VS1	27K	B	29	F	PCC	RET	c.2753T>C	p.Met918Thr	No	-	No	47	-	-
B_RET.VSI12	GSM957968	VS1	27K	B	39	F	PCC	RET	c.2753T>C	p.Met918Thr	No	-	No	7	-	-
B_RET.VSI13	GSM957969	VS1	27K	B	52	F	PCC	RET	c.1894_1899del	p.Glu632Leu633del	No	-	No	48	-	-
B_SDHA.VSI01	GSM957963	VS1	27K	B	32	F	PCC	SDHA	c.1765C>T	p.Arg589Trp	No	-	No	5	-	-
B_SDHB.VSI01	GSM957853	VS1	27K	B	31	F	PCC	SDHB	c.136C>G	p.Arg46Gly	No	-	No	51	-	-
M_SDHB.VSI02	GSM957888	VS1	27K	M	38	F	Meta	SDHB	c.758G>A	p.Cys253Tyr	Yes	0	Yes	24	-	-
M_SDHB.VSI03	GSM957885	VS1	27K	M	44	M	PGL	SDHB	c.689G>A	p.Arg230His	Yes	0	Yes	8	-	-
M_SDHB.VSI04	GSM957886	VS1	27K	M	24	F	PGL/PCCg	SDHB	c.620_621del	p.Leu207ArgfsX14	Yes	33	Yes	72	-	-
M_SDHB.VSI05	GSM957910	VS1	27K	M	29	M	PGL	SDHB	c.127G>C	p.Ala43Pro	Yes	12	Yes	71	-	-
B_SDHB.VSI06	GSM957928	VS1	27K	B	21	F	PCC	SDHB	c.758G>A	p.Cys253Tyr	No	-	No	85	-	-
M_SDHB.VSI07	GSM957930	VS1	27K	M	28	M	PCC	SDHB	c.1-?_72+?del	del exon 1	Yes	0	Yes	5	-	-
M_SDHB.VSI08	GSM957934	VS1	27K	M	59	M	PCC	SDHB	c.203G>A	p.Cys68Tyr	Yes	0	No	112	-	-
B_SDHB.VSI09	GSM957967	VS1	27K	B	33	F	PGL	SDHB	c.200+1G>A	p.?	No	-	No	4	-	-
B_SDHB.VSI10	GSM957972	VS1	27K	B	10	F	PGL	SDHB	c.713del	p.Phe238SerfsX10	No	-	No	55	-	-
B_SDHB.VSI11	GSM957976	VS1	27K	B	20	F	PCC	SDHB	c.166_170del	p.Pro56TyrfsX5	No	-	No	40	-	-
B_SDHB.VSI12	GSM957977	VS1	27K	B	47	F	PGL	SDHB	c.540+2T>C	p.?	No	-	No	50	-	-
M_SDHB.VSI13	GSM1519448	VS1	27K	M	28	M	PCC	SDHB	c.137G>A	p.Arg46Gln	Yes	0	yes	7	-	-
M_SDHB.VSI14	GSM1519450	VS1	27K	M	56	F	PCC	SDHB	c.689G>A	p.Arg230His	Yes	0	yes	104	-	-
M_SDHB.VSI15	GSM1519451	VS1	27K	M	28	M	PGL	SDHB	c.137G>A	p.Arg46Gln	Yes	0	yes	104	-	-
M_SDHB.VSI16	GSM1519452	VS1	27K	M	28	M	PGL	SDHB	c.137G>A	p.Arg46Gln	Yes	243	yes	278	-	-
B_SDHC.VSI01	GSM957981	VS1	27K	B	16	F	PGL	SDHC	c.21-?_77+?del	del exon 2	No	-	No	0	-	-
B_SDHD.VSI01	GSM957852	VS1	27K	B	45	M	PCC	SDHD	c.64C>T	p.Arg22X	No	-	No	101	-	-
B_SDHD.VSI02	GSM957865	VS1	27K	B	32	M	PGL	SDHD	c.64C>T	p.Arg22X	No	-	No	87	-	-
B_SDHD.VSI03	GSM957890	VS1	27K	B	31	F	PGL	SDHD	c.202dup	p.Ser68LysfsX46	No	-	No	7	-	-
B_TMEM127.VSI01	GSM957858	VS1	27K	B	44	F	PCC	TMEM127	c.156G>A	p.Ala47Asp	No	-	No	183	-	-
B_VHL.VSI01	GSM957840	VS1	27K	B	45	M	PCC	VHL	c.462A>T	p.Pro154Pro	No	-	No	23	-	-
B_VHL.VSI02	GSM957843	VS1	27K	B	46	M	PCC	VHL	c.293A>G	p.Tyr98Cys	No	-	No	88	-	-
B_VHL.VSI03	GSM957851	VS1	27K	B	12	M	PCC	VHL	c.290C>T	p.Pro97Leu	No	-	No	36	-	-
B_VHL.VSI04	GSM957856	VS1	27K	B	26	F	PCC	VHL	c.193T>G	p.Ser65Ala	No	-	No	31	-	-
B_VHL.VSI05	GSM957881	VS1	27K	B	22	M	PCC	VHL	c.1-?_642+?del	del totale	No	-	No	62	-	-
B_VHL.VSI06	GSM957882	VS1	27K	B	17	M	PCC	VHL	c.467A>G	p.Tyr156Cys	No	-	No	12	-	-
B_VHL.VSI07	GSM957887	VS1	27K	B	15	M	PCC	VHL	c.533T>C	p.Leu178Pro	No	-	No	139	-	-
B_VHL.VSI08	GSM957902	VS1	27K	B	10	M	PCC	VHL	c.499C>T	p.Arg167Trp	No	-	No	148	-	-
B_VHL.VSI09	GSM957904	VS1	27K	B	25	M	PCC	VHL	c.482G>A	p.Arg161Gln	No	-	No	104	-	-
B_VHL.VSI10	GSM957907	VS1	27K	B	10	F	PCC	VHL	c.290C>T	p.Pro97Leu	No	-	No	79	-	-
B_VHL.VSI11	GSM957916	VS1	27K	B	40	M	PCC	VHL	c.642A>T	p.X214Cys	No	-	No	9	-	-
M_VHL.VSI12	GSM957927	VS1	27K	M	65	F	PCC	VHL	c.466T>C	p.Tyr156His	Yes	-	No	34	-	-
M_VHL.VSI13	GSM957935	VS1	27K	M	36	F	PGL	VHL	c.464-?_642+?del	del exon 3	Yes	-	No	38	-	-
B_VHL.VSI14	GSM957939	VS1	27K	B	19	F	PCC	VHL	c.292T>C	p.Tyr98His	No	-	No	45	-	-
B_VHL.VSI15	GSM957943	VS1	27K	B	7	F	PCC	VHL	c.482G>A	p.Arg161Gln	No	-	No	118	-	-
B_VHL.VSI16	GSM957956	VS1	27K	B	15	F	PCC	VHL	c.500G>A	p.Arg167Gln	No	-	No	11	-	-
B_VHL.VSI17	GSM957962	VS1	27K	B	49	F	PCC	VHL	c.360A>C	p.Arg120Ser	No	-	No	28	-	-
B_VHL.VSI18	GSM957966	VS1	27K	B	55	F	PCC	VHL	c.475A>G	p.Lys159Glu	No	-	No	12	-	-
B_VHL.VSI19	GSM957978	VS1	27K	B	26	M	PGL	VHL	c.460C>T	p.Pro154Ser	No	-	No	5	-	-
B_VHL.VSI20	GSM957979	VS1	27K	B	16	F	PCC	VHL	c.500G>A	p.Arg167Gln	No	-	No	40	-	-
B_VHL.VSI21	GSM957980	VS1	27K	B	27	M	PCC	VHL	c.496G>T	p.Val166Phe	No	-	No	0	-	-
M_VHL.VSI22	GSM1519444	VS1	27K	M	26	F	PGL	VHL	c.496G>T	p.Val166Phe	Yes	243	yes	278	-	-
M_VHL.VSI23	GSM1519445	VS1	27K	M	26	F	PGL	VHL	c.496G>T	p.Val166Phe	Yes	40	yes	92	-	-
M_VHL.VSI24	GSM1519449	VS1	27K	M	13	M	PCC	VHL	c.533T>C	p.Leu178Pro	Yes	0	No	82	-	-
B_WT.VSI01	GSM957837	VS1	27K	B	53	F	PCC	WT	-	-	No	-	No	54	-	-
B_WT.VSI02	GSM957841	VS1	27K	B	60	M	PCC	WT	-	-	No	-	No	11	-	-
B_WT.VSI03	GSM957842	VS1	27K	B	51	M	PGL	WT	-	-	No	-	No	31	-	-
B_WT.VSI04	GSM957845	VS1	27K	B	41	F	PCC	WT	-	-	No	-	No	18	-	-
B_WT.VSI05	GSM957846	VS1	27K	B	69	M	PCC	WT	-	-	No	-	No	57	-	-
B_WT.VSI06	GSM957848	VS1	27K	B	28	F	PCC	WT	-	-	No	-	No	15	-	-
B_WT.VSI07	GSM957849	VS1	27K	B	40	M	PCC	WT	-	-	No	-	No	22	-	-
B_WT.VSI08	GSM957850	VS1	27K	B	68	F	PCC	WT	-	-	No	-	No	54	-	-
B_WT.VSI09	GSM957854	VS1	27K	B	66	M	PCC	WT	-	-	No	-	No	68	-	-
B_WT.VSI10	GSM957855	VS1	27K	B	47	F	PCC	WT	-	-	No	-	No	20	-	-
B_WT.VSI11	GSM957859	VS1	27K	B	41	F	PCC	WT	-	-	No	-	No	85	-	-
B_WT.VSI12	GSM957860	VS1	27K	B	46	M	PCC	WT	-	-	No	-	No	24	-	-
M_WT.VSI13	GSM957864	VS1	27K	M	46	F	Meta	WT	-	-	Yes	-	No	158	-	-
B_WT.VSI14	GSM957867	VS1	27K	B	49	M	PGL	WT	-	-	No	-	No	86	-	-
B_WT.VSI15	GSM957870	VS1	27K	B	31	M	PCC	WT	-	-	No	-	No	31	-	-
B_WT.VSI16	GSM957871	VS1	27K	B	44	F	PCC	WT	-	-	No	-	No	28	-	-
B_WT.VSI17	GSM957875	VS1	27K	B	37	F	PCC	WT	-	-	No	-	No	0	-	-
B_WT.VSI18	GSM957876	VS1	27K	B	45	F	PGL	WT	-	-	No	-	No	25	-	-
B_WT.VSI19	GSM957891	VS1	27K	B	34	F	PCC	WT	-	-	No	-	No	74	-	-
B_WT.VSI20	GSM957892	VS1	27K	B	64	M	PCC	WT	-	-	No	-	No	40	-	-
B_WT.VSI21	GSM957893	VS1	27K	B	50	F	PCC	WT	-	-	No	-	No	68	-	-
B_WT.VSI22	GSM957894	VS1	27K	B	44	F	PCC	WT	-	-	No	-	No	61	-	-
B_WT.VSI23	GSM957897	VS1	27K	B	55	M	PCC	WT	-	-	No	-	No	142	-	-
B_WT.VSI24	GSM957899	VS1	27K	B	23	F	PCC	WT	-	-	No	-	No	34	-	-
B_WT.VSI25	GSM957900	VS1	27K	B	27	M	PCC	WT	-	-	No	-	No	17	-	-
B_WT.VSI26	GSM957901	VS1	27K	B	47	M	PCC	WT	-	-	No	-	No	120	-	-
B_WT.VSI27	GSM957903	VS1	27K	B	55	F	PCC	WT	-	-	No	-	No	96	-	-
B_WT.VSI28	GSM957908	VS1	27K	B	28	F	PCC	WT	-	-	No	-	No	43	-	-
B_WT.VSI29	GSM957911	VS1	27K	B	58	F	PCC	WT	-	-	No	-	No	6	-	-
B_WT.VSI31	GSM957914	VS1	27K	B	59	M	PCC	WT	-	-	No	-	No	4	-	-
B_WT.VSI32	GSM957915	VS1	27K	B	60	F	PCC	WT	-	-	No	-	No	32	-	-
B_WT.VSI33	GSM957917	VS1	27K	B	21	M	PCC	WT	-	-	No	-	No	9	-	-
B_WT.VSI34	GSM957919	VS1	27K	B	40	F	PCC	WT	-	-	No	-	No	7	-	-
B_WT.VSI35	GSM957920	VS1	27K	B	36	F	PCC	WT	-	-	No	-	No	42	-	-
B_WT.VSI36	GSM957921	VS1	27K	B	58	F	PCC	WT	-	-	No	-	No	5	-	-
B_WT.VSI37	GSM957922	VS1	27K	B	82	F	PCC	WT	-	-	No	-	No	6	-	-
B_WT.VSI38	GSM957925	VS1	27K	B	64	F	PCC	WT	-	-	No	-	No	14	-	-
B_WT.VSI39	GSM957929	VS1	27K	B	44	M	PCC	WT	-	-	No	-	No	81	-	-
M_WT.VSI40	GSM957931	VS1	27K	M	15	F	PCC	WT	-	-	Yes	4	YES	100	-	-
M_WT.VSI41	GSM957936	VS1	27K	M	27	F	PCC	WT	-	-	Yes	51	No	161	-	-
B_WT.VSI42	GSM957940	VS1	27K	B	66	F	PCC	WT	-	-	No	-	No	5	-	-
B_WT.VSI43	GSM957944	VS1	27K	B	60	M	PCC	WT	-	-	No	-	No	56	-	-
B_WT.VSI44	GSM957945	VS1	27K	B	47	M	PCC	WT	-	-	No	-	No	67	-	-
B_WT.VSI45	GSM957947	VS1	27K	B	47	F	PGL	WT	-	-	No	-	No	21	-	-
B_WT.VSI47	GSM957951	VS1	27K	B	58	F	PCC	WT	-	-	No	-	No	44	-	-
B_WT.VSI48	GSM957952	VS1	27K	B	44	F	PCC	WT	-	-	No	-	No	11	-	-
B_WT.VSI49	GSM957954	VS1	27K	B	74	F	PCC	WT	-	-	No	-	No	22	-	-
B_WT.VSI50	GSM957955	VS1	27K	B	37	F	PCC	WT	-	-	No	-	No	42	-	-
B_WT.VSI51	GSM957957	VS1	27K	B	37	F	PCC	WT	-	-	No	-	No	60	-	-
B_WT.VSI52	GSM957958	VS1	27K	B	70	F	PCC	WT	-	-	No	-	No	10	-	-
B_WT.VSI53	GSM957960	VS1	27K	B	61	F	PCC	WT	-	-	No	-	No	26	-	-
B_WT.VSI54	GSM957961	VS1	27K	B	40	F	PCC	WT	-	-	No	-	No	13	-	-
B_WT.VSI55	GSM957964	VS1	27K	B	67	M	PCC	WT	-	-	No	-	No	48	-	-
B_WT.VSI56	GSM957965	VS1	27K	B	63	F	PCC	WT	-	-	No	-	No	19	-	-
B_WT.VSI57	GSM957970	VS1	27K	B	52	F	PCC	WT	-	-	No	-	No	54	-	-
B_WT.VSI58	GSM957973	VS1	27K	B	66	F	PCC	WT	-	-	No	-	No	37	-	-
B_WT.VSI59	GSM957974	VS1	27K	B	58	F	PCC	WT	-	-	No	-	No	1	-	-
M_WT.VSI60	GSM1519443	VS1	27K	M	35	M	PGL	WT	-	-	Yes	0	No	107	-	-
M_WT.VSI61	GSM1519446	VS1	27K	M	40	F	PGL	WT	-	-	Yes	40	yes	92	-	-
M_WT.VSI62	GSM1519447	VS1	27K	M	40	F	PGL	WT	-	-	Yes	40	yes	92	-	-
B_HRAS.VS2-1	-	VS2	Pyro	B	51	F	PGL	HRAS	c.181C>A	p.Cln61Lys	No	-	No	68	-	-
M_HRAS.VS2-2	-	VS2	Pyro	M	62	F	PCC	HRAS	c.182A>G	p.Gln61Arg	Yes	0	No	44	-	-
M_SDHA.VS2-1	-	VS2	Pyro	M	71	M	PGL	SDHA	c.457-1A>G	p.?	Yes	3	Yes	8	-	-
B_SDHB.VS2-1	-	VS2	Pyro	B	19	F	PGL	SDHB	Gross deletion exon 1	IVS2+33G>A	No	-	no	36	-	-
B_SDHB.VS2-2	-	VS2	Pyro	B	34	F	PGL	SDHB	c.278G>A	p.Cys93Tyr	No	-	No	90	-	-
B_SDHB.VS2-3	-	VS2	Pyro	B	34	F	PGL	SDHB	c.595delTACTGGTGGAinsGG	p.?	No	-	No	180	-	-
B_VHL.VS2-1	-	VS2	Pyro	B	37	M	PCC	VHL	c.482G>A	p.Arg161Gln	No	-	No	66	-	-
B_VHL.VS2-2	-	VS2	Pyro	B	51	M	PCC	VHL	c.188T>A*	p.Leu63Gln	No	-	No	104	-	-
M_VHL.VS2-3	-	VS2	Pyro	M	11	M	PCC	VHL	c.100_181del&100_101insC	p.Arg167Trp	Yes	72	No	157	-	-
B_WT.VS2-1	-	VS2	Pyro	B	64	M	PGL	WT	-	-	No	-	No	49	-	-
B_WT.VS2-2	-	VS2	Pyro	B	45	F	PCC	WT	-	-	No	-	No	91	-	-
B_WT.VS2-3	-	VS2	Pyro	B	9	M	PCC	WT	-	-	No	-	No	40	-	-
B_WT.VS2-4	-	VS2	Pyro	B	74	M	PCC	WT	-	-	No	-	No	89	-	-
B_WT.VS2-5	-	VS2	Pyro	B	46	F	PCC	WT	-	-	No	-	No	52	-	-
B_WT.VS2-6	-	VS2	Pyro	B	66	M	PCC	WT	-	-	No	-	No	80	-	-
B_WT.VS2-7	-	VS2	Pyro	B	57	F	PCC	WT	-	-	No	-	No	NA	-	-
B_WT.VS2-8	-	VS2	Pyro	B	42	M	PCC	WT	-	-	No	-	No	7	-	-
M_WT.VS2-9	-	VS2	Pyro	M	65	M	PGL	WT	-	-	Yes	48	No	19	-	-
M_WT.VS2-10	-	VS2	Pyro	M	65	M	PCC	WT	-	-	Yes	36	No	80	-	-
M_WT.VS2-11	-	VS2	Pyro	M	74	M	PCC	WT	-	-	Yes	0	No	NA	-	-
M_WT.VS2-12	-	VS2	Pyro	M	63	M	PCC	WT	-	-	Yes	0	No	19	-	-
M_WT.VS2-13	-	VS2	Pyro	M	46	F	PCC	WT	-	-	Yes	26	Yes	44	-	-
M_WT.VS2-14	-	VS2	Pyro	M	70	F	PCC	WT	-	-	Yes	NA	No	NA	-	-
M_WT.VS2-15	-	VS2	Pyro	M	65	F	PCC	WT	-	-	Yes	NA	No	NA	-	-
M_WT.VS2-16	-	VS2	Pyro	M	64	F	PCC	WT	-	-	Yes	0	No	0	-	-
M_WT.VS2-17	-	VS2	Pyro	M	61	F	PCC	WT	-	-	Yes	0	No	70	-	-
M_WT.VS2-18	-	VS2	Pyro	M	42	M	PCC	WT	-	-	Yes	28	Yes	34	-	-
M_WT.VS2-19	-	VS2	Pyro	M	43	M	PCC	WT	-	-	Yes	0	No	86	-	-
M_WT.VS2-20	-	VS2	Pyro	M	62	M	PCC	WT	-	-	Yes	0	No	124	-	-
M_WT.VS2-21	-	VS2	Pyro	M	23	F	PCC	WT	-	-	Yes	0	No	NA	-	-
M_WT.VS2-22	-	VS2	Pyro	M	62	F	PGL	WT	-	-	Yes	0	No	3	-	-
M_WT.VS2-23	-	VS2	Pyro	M	34	M	PGL	WT	-	-	Yes	0	No	100	-	-
M_WT.VS2-24	-	VS2	Pyro	M	69	F	PCC	WT	-	-	Yes	12	No	19	-	-
